# Supplementary material
Source: ML conference proceedings conference paper supplement (https://openreview.net/forum?id=603JjFZ3u8)
Supplement: supplementary_material [file attachment]

# Progressive Local and Non-Local Interactive Networks with Deeply Discriminative Training for Image Deraining —Supplementary Materials—

Cong Wang  
Shenzhen Campus of Sun Yat-sen  
University & The Hong Kong  
Polytechnic University  
Shenzhen & Hong Kong, China  
supercong94@gmail.com

Liyan Wang  
Dalian University of Technology  
Dalian, China  
wangliyan@dlut.edu.cn

Jie Mu  
Dongbei University of Finance and  
Economics  
Dalian, China  
jiemu@dufe.edu.cn

Chengjin Yu  
Anhui University  
Hefei, China  
23073@ahu.edu.cn

Wei Wang\*  
Shenzhen Campus of Sun Yat-sen  
University  
Shenzhen, China  
wangwei29@mail.sysu.edu.cn

## ABSTRACT

In Sec. 1, we present the sensitiveness on the hyper-parameter.

## CCS CONCEPTS

• **Computing methodologies** → **Computational photography**.

## KEYWORDS

Single image deraining, Multi-Scale Cross-Content Deeply Discriminative Learning, Progressive Interactive Networks, Convolution, Transformer

### ACM Reference Format:

Cong Wang, Liyan Wang, Jie Mu, Chengjin Yu, and Wei Wang. 2024. Progressive Local and Non-Local Interactive Networks with Deeply Discriminative Training for Image Deraining –Supplementary Materials–. In *Proceedings of the 32nd ACM International Conference on Multimedia (MM '24)*, October 28–November 1, 2024, Melbourne, VIC, Australia. ACM, Ontario, Canada, 2 pages. <https://doi.org/10.1145/3664647.3681399>

## 1 SENSITIVENESS ON THE HYPER-PARAMETERS

Table 1 provides the sensitiveness results on the hyper-parameters ( $\alpha$  and  $\beta$  in Eq. (9) of the main paper). Note that the results have slight fluctuations for different values of  $\alpha$  and  $\beta$ .

## REFERENCES

\*Wei Wang is the Corresponding author.

Permission to make digital or hard copies of all or part of this work for personal or classroom use is granted without fee provided that copies are not made or distributed for profit or commercial advantage and that copies bear this notice and the full citation on the first page. Copyrights for components of this work owned by others than the author(s) must be honored. Abstracting with credit is permitted. To copy otherwise, or republish, to post on servers or to redistribute to lists, requires prior specific permission and/or a fee. Request permissions from [permissions@acm.org](mailto:permissions@acm.org).  
MM '24, October 28–November 1, 2024, Melbourne, VIC, Australia.

© 2024 Copyright held by the owner/author(s). Publication rights licensed to ACM.  
ACM ISBN 979-8-4007-0686-8/24/10...\$15.00  
<https://doi.org/10.1145/3664647.3681399>

Table 1: Sensitiveness on the hyper-parameters.

| $\alpha$        | 0.1    | 0.2    | 0.5    | 1      | 2      | 3      | 4      | 5      | 6      | 7      | 8      | 9      | 10     |
|-----------------|--------|--------|--------|--------|--------|--------|--------|--------|--------|--------|--------|--------|--------|
| PSNR $\uparrow$ | 30.074 | 30.074 | 30.100 | 30.164 | 30.125 | 30.170 | 30.179 | 30.107 | 30.076 | 30.533 | 30.122 | 30.116 | 30.074 |
| SSIM $\uparrow$ | 0.9206 | 0.9204 | 0.9213 | 0.9227 | 0.9218 | 0.9224 | 0.9224 | 0.9211 | 0.9205 | 0.9206 | 0.9210 | 0.9213 | 0.9210 |

| $\beta$         | 0.1    | 0.2    | 0.5    | 1      | 2      | 3      | 4      | 5      | 6      | 7      | 8      | 9      | 10     |
|-----------------|--------|--------|--------|--------|--------|--------|--------|--------|--------|--------|--------|--------|--------|
| PSNR $\uparrow$ | 30.077 | 30.094 | 30.145 | 30.164 | 30.153 | 30.153 | 30.086 | 30.094 | 30.085 | 30.073 | 30.067 | 30.073 | 30.079 |
| SSIM $\uparrow$ | 0.9218 | 0.9221 | 0.9225 | 0.9227 | 0.9226 | 0.9221 | 0.9223 | 0.9224 | 0.9222 | 0.9216 | 0.9213 | 0.9219 | 0.9216 |
